# Supplementary material
Source: ML conference proceedings conference paper supplement (https://openreview.net/forum?id=wcxrJcJ7vq)

— teacher-discrimantor loss on first data subset seen      - - other teachers-discrimantors loss on same data subset

updated

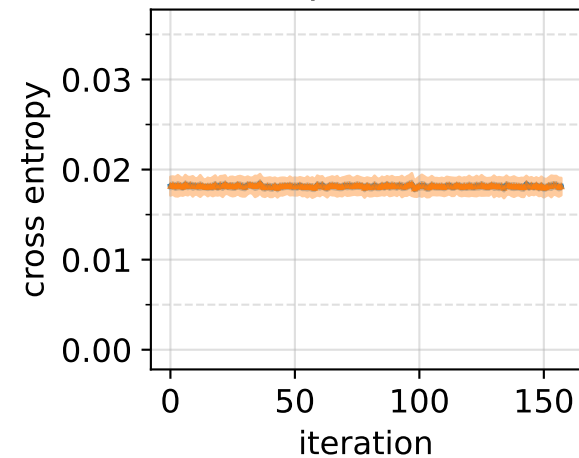

synthcity

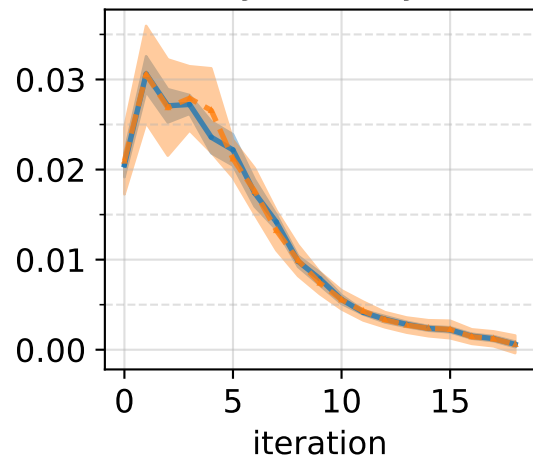

borealis

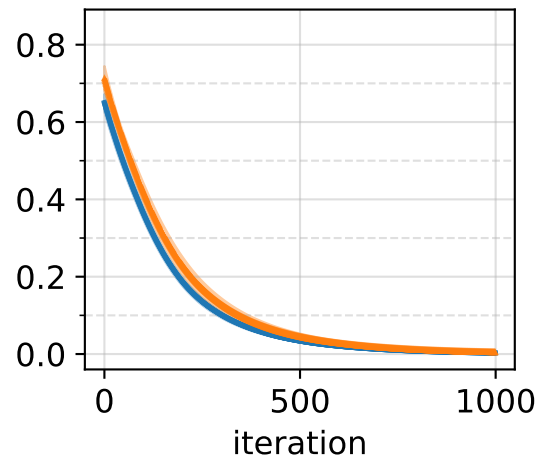

smartnoise

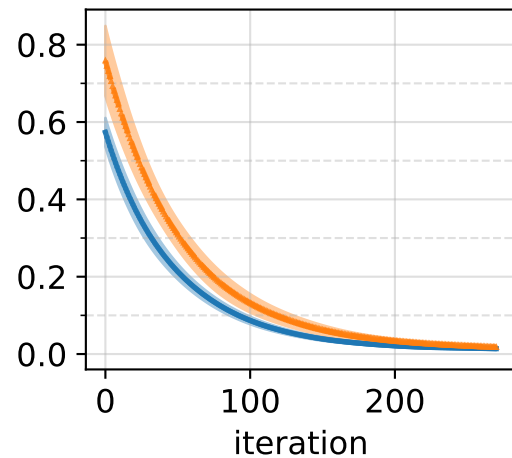

Supplement: supplementary_material [file attachment]
