# Supplementary material
Source: ML conference proceedings conference paper supplement (https://openreview.net/forum?id=wcxrJcJ7vq)

data records only teacher has seen      data records other teachers have seen

updated

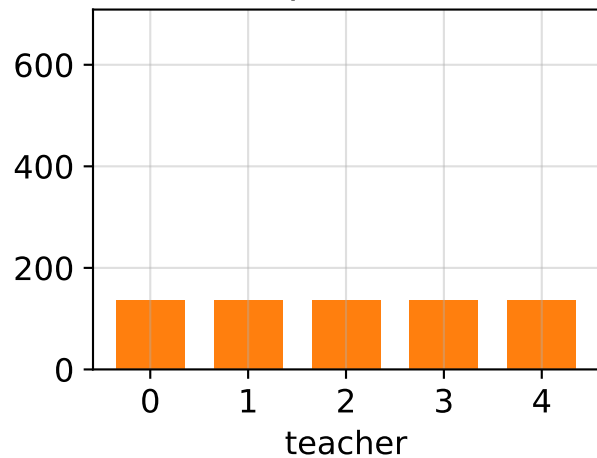

synthcity

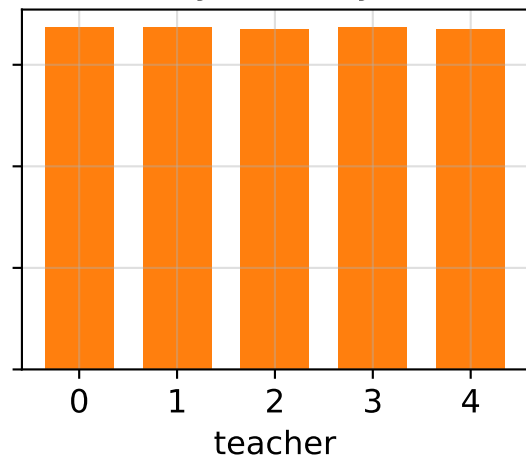

borealis

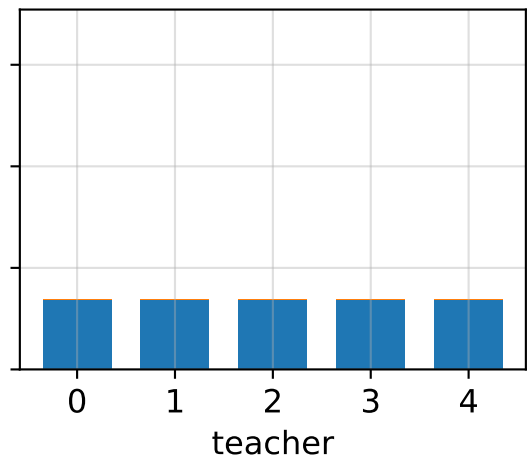

smartnoise

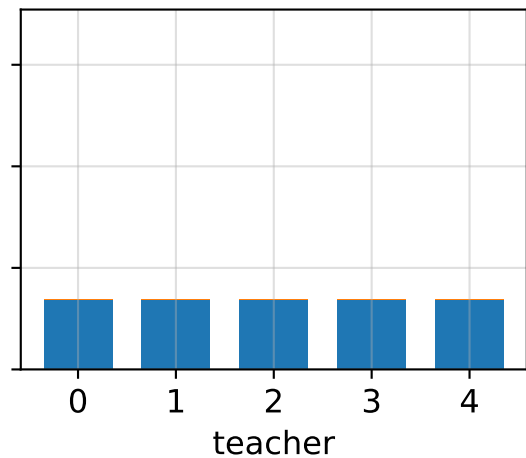

Supplement: supplementary_material [file attachment]
